# Supplementary material
Source: PubMed Central journal article supplement (PMC2776507)

## Supplemental Figure 1

A)

| Gene                 | position | function                                      | copy number       | X-Y homologous?    | expression pattern |
|----------------------|----------|-----------------------------------------------|-------------------|--------------------|--------------------|
| <i>Ddx3x</i>         | X A1.1   | helicase, nucleic acid binding, transcription | 1                 | yes, <i>Ddx3y</i>  | multiple tissues   |
| <i>Eif1ay</i>        | X F4     | translation initiation                        | 1                 | no                 | multiple tissues   |
| <i>Fmr1</i>          | X A7.1   | mRNA transport, modulator of translation      | 1                 | no                 | multiple tissues   |
| <i>Nxf2</i>          | X E3     | RNA export from the nucleus                   | 1                 | no                 | multiple tissues   |
| <i>Ott</i>           | X F2, F3 | unknown                                       | 12                | no                 | ovary, testis      |
| <i>Scml2</i>         | X F4     | transcription repression                      | 1                 | no                 | multiple tissues   |
| <i>Slx</i>           | X A2, A3 | unknown, contains COR1 domain                 | 25*               | yes, <i>Sly</i>    | spermatids         |
| <i>4930527E24RIK</i> | X A5     | unknown, contains COR1 domain                 | 14*               | yes, <i>Sly</i>    | spermatids         |
| <i>Vsig1</i>         | X F1     | contains Immunoglobulin V-set domain          | 1                 | no                 | multiple tissues   |
| <i>Xiap</i>          | X A4     | negative regulator of apoptosis               | 1                 | no                 | multiple tissues   |
|                      |          |                                               |                   |                    |                    |
| <i>Ube1y1</i>        | Y A1     | ubiquitin activating enzyme                   | 1 & 2 pseudogenes | yes, <i>Ube1x1</i> | testis, pancreas   |
| <i>Zfy1</i>          | Y A1     | regulator of transcription                    | 2                 | yes, <i>Zfx</i>    | testis             |
| <i>Uty</i>           | Y A1     | chromatin modification                        | 1                 | yes, <i>Utx</i>    | multiple tissues   |
|                      |          |                                               |                   |                    |                    |
| <i>Adam3</i>         | 8 A2     | binding of sperm to zona pellucida of egg     | 1                 | no                 | testis             |
| <i>Atr</i>           | 9 E4     | DNA damage checkpoint & response              | 1                 | no                 | multiple tissues   |
| <i>Brca1</i>         | 11 D     | DNA damage response, DNA repair               | 1                 | no                 | multiple tissues   |
| <i>Grhpr</i>         | 4 B2     | oxidation reduction, metabolic process        | 1                 | no                 | multiple tissues   |
| <i>Miwi</i>          | 5 G1     | germ cell gene silencing by RNAi              | 1                 | no                 | testis             |
| <i>Pde6d</i>         | 1 D      | 3',5'-cyclic-nucleotide phosphodiesterase     | 1                 | no                 | multiple tissues   |
| <i>Prkdc</i>         | 16 B1    | response to DNA damage, dsb repair            | 1                 | no                 | multiple tissues   |
| <i>Zscan2</i>        | 7 D3     | regulation of transcription                   | 1                 | no                 | multiple tissues   |

B)

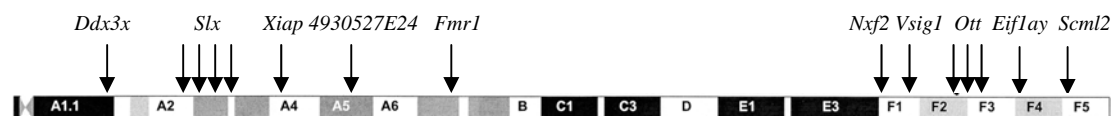

Supplement: supp_122_22_4239__1.pdf [file supp_122_22_4239__1.pdf]
