# Supplementary material
Source: PubMed Central journal article supplement (PMC2776507)

## Supplemental Figure 2

**A**

| Number of RNA signals | % of XY spermatids | % of MSYq- spermatids |
|-----------------------|--------------------|-----------------------|
| 1                     | 14                 | 0                     |
| 2                     | 12                 | 2                     |
| 3                     | 28                 | 6                     |
| 4                     | 18                 | 6                     |
| 5                     | 10                 | 14                    |
| 6                     | 4                  | 10                    |
| 7                     | 10                 | 8                     |
| 8                     | 0                  | 8                     |
| 9                     | 2                  | 12                    |
| 10                    | 2                  | 14                    |
| 11                    | 0                  | 4                     |
| 12                    | 0                  | 4                     |
| 13                    | 0                  | 2                     |
| 14                    | 0                  | 0                     |
| 15                    | 0                  | 0                     |
| 16                    | 0                  | 4                     |
| 17                    | 0                  | 4                     |
| 18                    | 0                  | 2                     |

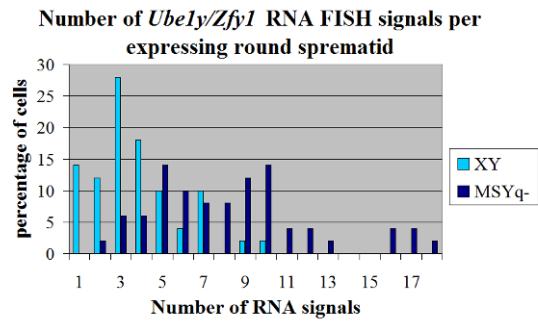

**B**

| Number of RNA signals | % of XY spermatids | % of MSYq- spermatids |
|-----------------------|--------------------|-----------------------|
| 1                     | 40                 | 5                     |
| 2                     | 35                 | 20                    |
| 3                     | 10                 | 15                    |
| 4                     | 10                 | 5                     |
| 5                     | 5                  | 10                    |
| 6                     | 0                  | 15                    |
| 7                     | 0                  | 15                    |
| 8                     | 0                  | 5                     |
| 9                     | 0                  | 0                     |
| 10                    | 0                  | 5                     |
| 11                    | 0                  | 5                     |

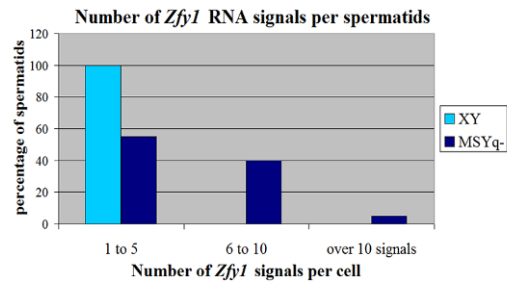

**C**

| Number of RNA signals | % of XY spermatids | % of MSYq- spermatids |
|-----------------------|--------------------|-----------------------|
| 1                     | 45                 | 0                     |
| 2                     | 30                 | 0                     |
| 3                     | 5                  | 15                    |
| 4                     | 10                 | 5                     |
| 5                     | 5                  | 20                    |
| 6                     | 0                  | 10                    |
| 7                     | 0                  | 0                     |
| 8                     | 0                  | 10                    |
| 9                     | 0                  | 25                    |
| 10                    | 0                  | 10                    |
| 11                    | 0                  | 5                     |

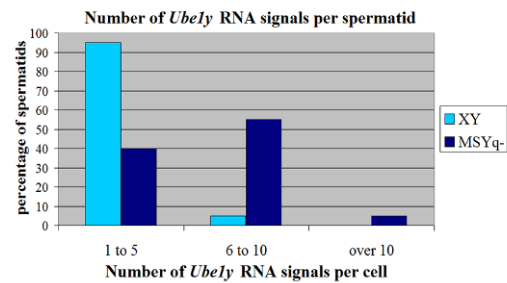

**D**

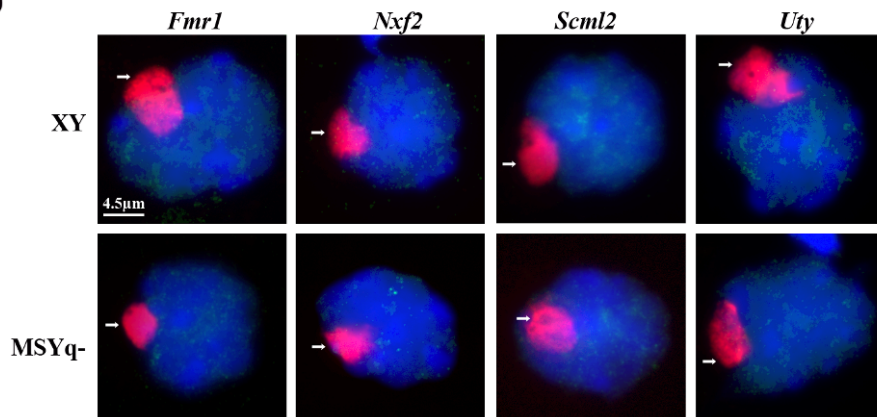

**E**

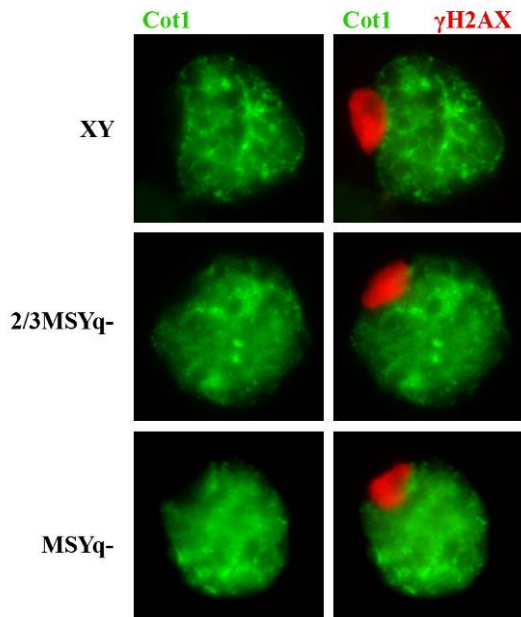

Supplement: supp_122_22_4239__2.pdf [file supp_122_22_4239__2.pdf]
