# Supplementary material
Source: PubMed Central journal article supplement (PMC2776507)

## Supplemental Figure 3

A

| Positive signal for        | XY spermatids | MSYq- spermatids |
|----------------------------|---------------|------------------|
| <i>Prdkc</i>               | 86/200 (43%)  | 83/201 (41.3%)   |
| <i>Zfy1</i>                | 54/200 (27%)  | 85/201 (42.3%)   |
| <i>Prdkc</i> & <i>Zfy1</i> | 28/86 (32.6%) | 37/83 (44.6%)    |

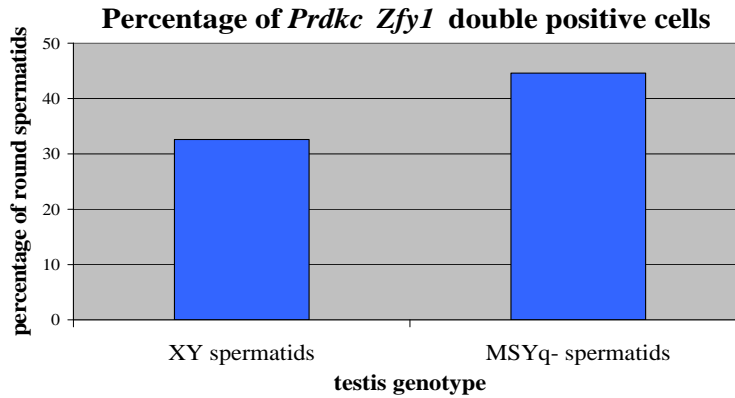

B

| Positive signal for         | XY spermatids  | MSYq- spermatids |
|-----------------------------|----------------|------------------|
| <i>Brcal</i>                | 170/200 (85%)  | 172/200 (86%)    |
| <i>Vsig1</i>                | 41/200 (20.5%) | 87/200 (43.5%)   |
| <i>Brcal</i> & <i>Vsig1</i> | 28/130 (21.5%) | 50/113 (44.3%)   |

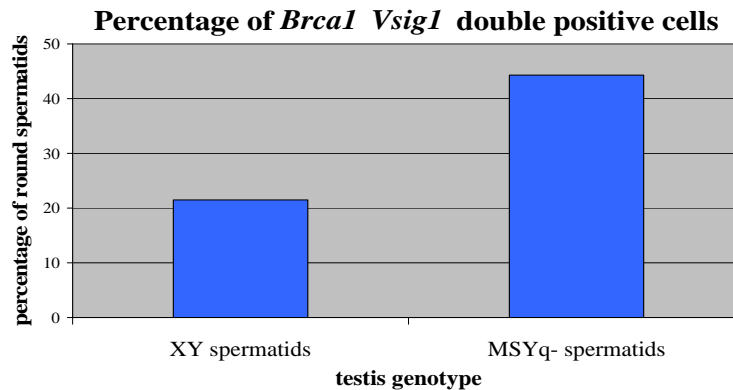

Supplement: supp_122_22_4239__3.pdf [file supp_122_22_4239__3.pdf]
