# Supplementary material
Source: PubMed Central journal article supplement (PMC2776507)
Supplement: supp_122_22_4239__8.pdf [file supp_122_22_4239__8.pdf]

**Table S1. The number of round spermatids expressing a given gene**

| Gene               | Chromosome | probe label | replicate   | XY     | 2/3MSYq- | MSYq-  |
|--------------------|------------|-------------|-------------|--------|----------|--------|
| <i>Ddx3x</i>       | X          | biotin      | replicate 1 | 16/102 | 17/100   | 32/105 |
|                    |            |             | replicate 2 | 20/100 | 27/103   | 38/100 |
|                    |            |             | replicate 3 | 20/101 | 26/101   | 36/101 |
| <i>Eif1ay</i>      | X          | DIG         | replicate 1 | 17/100 | 26/100   | 30/100 |
|                    |            |             | replicate 2 | 22/100 | 24/101   | 31/100 |
|                    |            |             | replicate 3 | 19/100 | 21/100   | 32/100 |
| <i>Fmr1</i>        | X          | biotin      | replicate 1 | 8/101  | 13/105   | 21/101 |
|                    |            |             | replicate 2 | 11/101 | 11/100   | 21/101 |
|                    |            |             | replicate 3 | 9/100  | 11/101   | 53/206 |
|                    |            |             | DIG         | 11/100 | N/A      | 19/100 |
| <i>Nxf2</i>        | X          | DIG         | replicate 1 | 20/101 | 30/100   | 36/103 |
|                    |            |             | replicate 2 | 18/100 | 31/100   | 32/100 |
|                    |            |             | replicate 3 | 17/100 | 33/100   | 30/100 |
| <i>Ott</i>         | X          | biotin      | replicate 1 | 21/101 | 23/100   | 30/106 |
|                    |            |             | replicate 2 | 19/102 | 22/102   | 24/103 |
|                    |            |             | replicate 3 | 20/101 | 25/100   | 35/101 |
| <i>Scml2</i>       | X          | DIG         | replicate 1 | 3/101  | 3/100    | 4/100  |
|                    |            |             | replicate 2 | 3/100  | 7/100    | 9/100  |
|                    |            |             | replicate 3 | 3/100  | 6/101    | 9/103  |
| <i>Slx</i>         | X          | biotin      | replicate 1 | 39/101 | 40/103   | 50/100 |
|                    |            |             | replicate 2 | 66/156 | 48/106   | 57/112 |
|                    |            |             | replicate 3 | 40/100 | 45/100   | 50/100 |
| 4930527E24RIK      | X          | biotin      | replicate 1 | 37/101 | 45/106   | 69/135 |
|                    |            |             | replicate 2 | 35/116 | 42/112   | 48/115 |
|                    |            |             | replicate 3 | 37/100 | 40/100   | 51/100 |
| <i>Vsig1</i>       | X          | biotin      | replicate 1 | 13/102 | 17/101   | 35/104 |
|                    |            |             | replicate 2 | 19/101 | 32/102   | 42/100 |
|                    |            |             | replicate 3 | 18/101 | 31/101   | 39/100 |
|                    |            |             | DIG         | 13/101 | N/A      | 38/100 |
| <i>Xiap</i>        | X          | biotin      | replicate 1 | 0/101  | 0/100    | 0/100  |
|                    |            |             | replicate 2 | 0/100  | 0/103    | 0/103  |
|                    |            |             | replicate 3 | 0/102  | 0/103    | 0/102  |
| <i>Ubely1/Zfy1</i> | Y          | biotin      | replicate 1 | 33/105 | 39/100   | 47/101 |
|                    |            |             | replicate 2 | 37/101 | 35/102   | 51/102 |
|                    |            |             | replicate 3 | 37/100 | 40/100   | 50/100 |
| <i>Ubely1 only</i> | Y          | DIG         | replicate 1 | 29/100 | N/A      | 47/100 |
| <i>Zfy1 only</i>   | Y          | DIG         | replicate 1 | 32/100 | N/A      | 48/100 |

| Gene          | Chromosome | probe label | replicate   | XY     | 2/3MSYq- | MSYq-   |
|---------------|------------|-------------|-------------|--------|----------|---------|
| <i>Uty</i>    | Y          | biotin      | replicate 1 | 9/101  | 13/101   | 27/107  |
|               |            | biotin      | replicate 2 | 17/100 | 18/101   | 29/101  |
|               |            | biotin      | replicate 3 | 20/103 | 23/100   | 27/100  |
| <i>Adam3</i>  | 8          | biotin      | replicate 1 | 10/100 | 5/102    | 9/102   |
|               |            | biotin      | replicate 2 | 0/101  | 0/100    | 0/100   |
|               |            | biotin      | replicate 3 | 7/103  | 6/100    | 5/101   |
| <i>Atr</i>    | 9          | biotin      | replicate 1 | 8/100  | 6/100    | 12/100  |
|               |            | biotin      | replicate 2 | 12/103 | 13/100   | 21/100  |
|               |            | biotin      | replicate 3 | 9/101  | 9/101    | 15/100  |
| <i>Brcal</i>  | 11         | biotin      | replicate 1 | 72/103 | 71/100   | 73/100  |
|               |            | biotin      | replicate 2 | 71/102 | 72/101   | 82/102  |
|               |            | biotin      | replicate 3 | 71/100 | 71/103   | 70/100  |
| <i>Grhpr</i>  | 4          | biotin      | replicate 1 | 61/101 | N/A      | 52/100  |
|               |            | biotin      | replicate 2 | 58/101 | 66/100   | 65/102  |
|               |            | biotin      | replicate 3 | 54/100 | 52/100   | 54/102  |
| <i>Miwi</i>   | 5          | DIG         | replicate   | 14/101 | 22/100   | 19/99   |
|               |            | DIG         | replicate 2 | 16/102 | 16/100   | 16/100  |
|               |            | DIG         | replicate 3 | 18/100 | 14/100   | 14/102  |
| <i>Pde6d</i>  | 1          | DIG         | replicate   | 23/101 | 20/100   | 27/101  |
|               |            | DIG         | replicate 2 | 27/100 | 26/100   | 25/101  |
|               |            | DIG         | replicate 3 | 24/100 | 25/100   | 24/101  |
| <i>Prkdc</i>  | 16         | biotin      | replicate 1 | 31/100 | 33/100   | 31/100  |
|               |            | biotin      | replicate 2 | 27/100 | 27/103   | 16/75 * |
|               |            | biotin      | replicate 3 | 26/100 | 28/100   | 27/100  |
| <i>Zscan2</i> | 7          | DIG         | replicate   | 46/100 | 45/101   | 49/100  |
|               |            | DIG         | replicate 2 | 45/100 | 46/103   | 47/105  |
|               |            | DIG         | replicate 3 | 48/100 | 43/100   | 44/100  |

For each gene, RNA FISH was replicated three times per genotype using different individuals each time, and approximately 100 spermatids per slide were analysed for the presence of an RNA FISH signal. Within each replicate, the RNA FISH was performed under the same conditions using a probe labelled at the same time, and so the values are comparable. Spermatid expression counts were performed by two independent observers and combined to give the final values. Spermatid counts were similar whether digoxigenin or biotin probes were used.

**Table S2. List of BAC, fosmid and long-range PCR products used as probes for gene-specific RNA FISH**

| Gene                 | BAC/Fosmid identifier | Source            | Long range FP                | Long range RP                 | Product size | Reference            |
|----------------------|-----------------------|-------------------|------------------------------|-------------------------------|--------------|----------------------|
| <i>Dbx3x</i>         | CITB-551M19           | Research Genetics | N/A                          | N/A                           | N/A          | Turner et al., 2006  |
| <i>Eif1ay</i>        | G135P63000G3          | CHORI             | N/A                          | N/A                           | N/A          |                      |
| <i>Fmr1</i>          | G135P65476A4          | CHORI             | CTGTCAGCAGGCAGCTTTTACATCCTGT | CTTGTGCGTGGACAGCATTTTGAGAGTA  | 12225        | Mueller et al., 2008 |
|                      | G135P65476A4          | CHORI             | ATGCCACCAAGTTCCTACCTCCAATA   | GTGACAAATATCTCTCCAACCCCAACA   | 12797        | Mueller et al., 2008 |
| <i>Nxf2</i>          | G135P60619D5          | CHORI             | N/A                          | N/A                           | N/A          |                      |
| <i>Ott</i>           | RP24-278F7            | CHORI             | GGGTTCCTTTCTTCTTGATCTGIGTTTC | GTCATTCACATGGATTGCTTTTGTGCAT  | 8893         | Mueller et al., 2008 |
| <i>Scml2</i>         | RP24-204O18           | CHORI             | N/A                          | N/A                           | N/A          | Mueller et al., 2008 |
| <i>Slx</i>           | RP23-470D15           | CHORI             | N/A                          | N/A                           | N/A          | Reynard et al., 2007 |
| <i>4930527E24Rik</i> | RP24-170G23           | CHORI             | TCATTCCCACCTCTGAAAACCTCCCTTA | TTTGTGATCATTTCAGGCATAGTGCCAAC | 8088         | Mueller et al., 2008 |
|                      | RP24-170G23           | CHORI             | TTCTGAAGAAATCGTTGGAGATACACG  | TCCGTACAAAAGGACTATTTGCCACTCA  | 9038         | Mueller et al., 2008 |
| <i>Vsig1</i>         | RP24-291J23           | CHORI             | N/A                          | N/A                           | N/A          |                      |
| <i>Xiap</i>          | G135P601754F5         | CHORI             | N/A                          | N/A                           | N/A          | Mueller et al., 2008 |
|                      |                       |                   |                              |                               |              |                      |
| <i>Ube1y1/Zfy1</i>   |                       | Research Genetics | N/A                          | N/A                           | N/A          |                      |
| <i>Uty</i>           | CITB-246A22           | Research Genetics | N/A                          | N/A                           | N/A          | Turner et al., 2006  |
| <i>Ube1y1 only</i>   |                       | Research Genetics | N/A                          | N/A                           | N/A          |                      |
| <i>Zfy1 only</i>     |                       | Research Genetics | N/A                          | N/A                           | N/A          |                      |
|                      |                       |                   |                              |                               |              |                      |
| <i>Adam3</i>         | RP24-103I8            | CHORI             | N/A                          | N/A                           | N/A          |                      |
| <i>Atr</i>           | RP24-3994J4           | CHORI             | N/A                          | N/A                           | N/A          |                      |
| <i>Brcal</i>         | BMq-359C01            | Gene Services     | N/A                          | N/A                           | N/A          |                      |
| <i>Grhpr</i>         | RP24-460J15           | CHORI             | N/A                          | N/A                           | N/A          |                      |
| <i>Miwi</i>          | G135P68585C5          | CHORI             | N/A                          | N/A                           | N/A          |                      |
| <i>Pde6d</i>         | G135P601320F1         | CHORI             | N/A                          | N/A                           | N/A          |                      |
| <i>Prkdc</i>         | RP24-354G13           | CHORI             | N/A                          | N/A                           | N/A          |                      |
| <i>Zscan2</i>        | G135P60383D9          | CHORI             | N/A                          | N/A                           | N/A          | Turner et al., 2006  |

**Table S3. List of antibodies used to analyse the PMSC and chromocentre epigenetic marks**

| <b>Antibody</b>                   | <b>Source</b>    | <b>Catalogue number</b> | <b>Dilution</b> |
|-----------------------------------|------------------|-------------------------|-----------------|
| rabbit anti-SLX69-81              | Eurogentec       | N/A                     | 1:100           |
| mouse anti- H2AX                  | Upstate          | 16-193                  | 1:200           |
| rabbit anti- H2AX                 | Upstate          | 07-164                  | 1:100           |
| rabbit anti-H3K4me3               | Abcam            | ab8580                  | 1:100           |
| rabbit anti-H3K9Ac                | Abcam            | ab4441-50               | 1:150           |
| rabbit anti-H3K9me3               | Upstate          | 07-442                  | 1:300           |
| rabbit anti-H3K9me2               | Upstate          | 07-212                  | 1:100           |
| rabbit anti-H3K36me3              | Abcam            | ab9050                  | 1:200           |
| rabbit anti-H4K8Ac                | Upstate          | 06-760                  | 1:100           |
| rabbit anti-H4K12Ac               | Upstate          | 06-761                  | 1:150           |
| rat anti-CBX1                     | Prim Singh       | N/A                     | 1:200           |
| Alexa 488 chicken anti-mouse IgG  | Molecular probes | A-21200                 | 1:500           |
| Alexa 488 chicken anti-rabbit IgG | Molecular probes | A-21441                 | 1:500           |
| Alexa 488 goat anti-rat IgG       | Molecular probes | A-11006                 | 1:500           |
| Alexa 594 chicken anti-mouse IgG  | Molecular probes | A-21201                 | 1:500           |
| Alexa 594 chicken anti-rabbit IgG | Molecular probes | A-21442                 | 1:500           |
