# Supplementary material
Source: PubMed Central journal article supplement (PMC2776507)

## Supplemental Figure 4

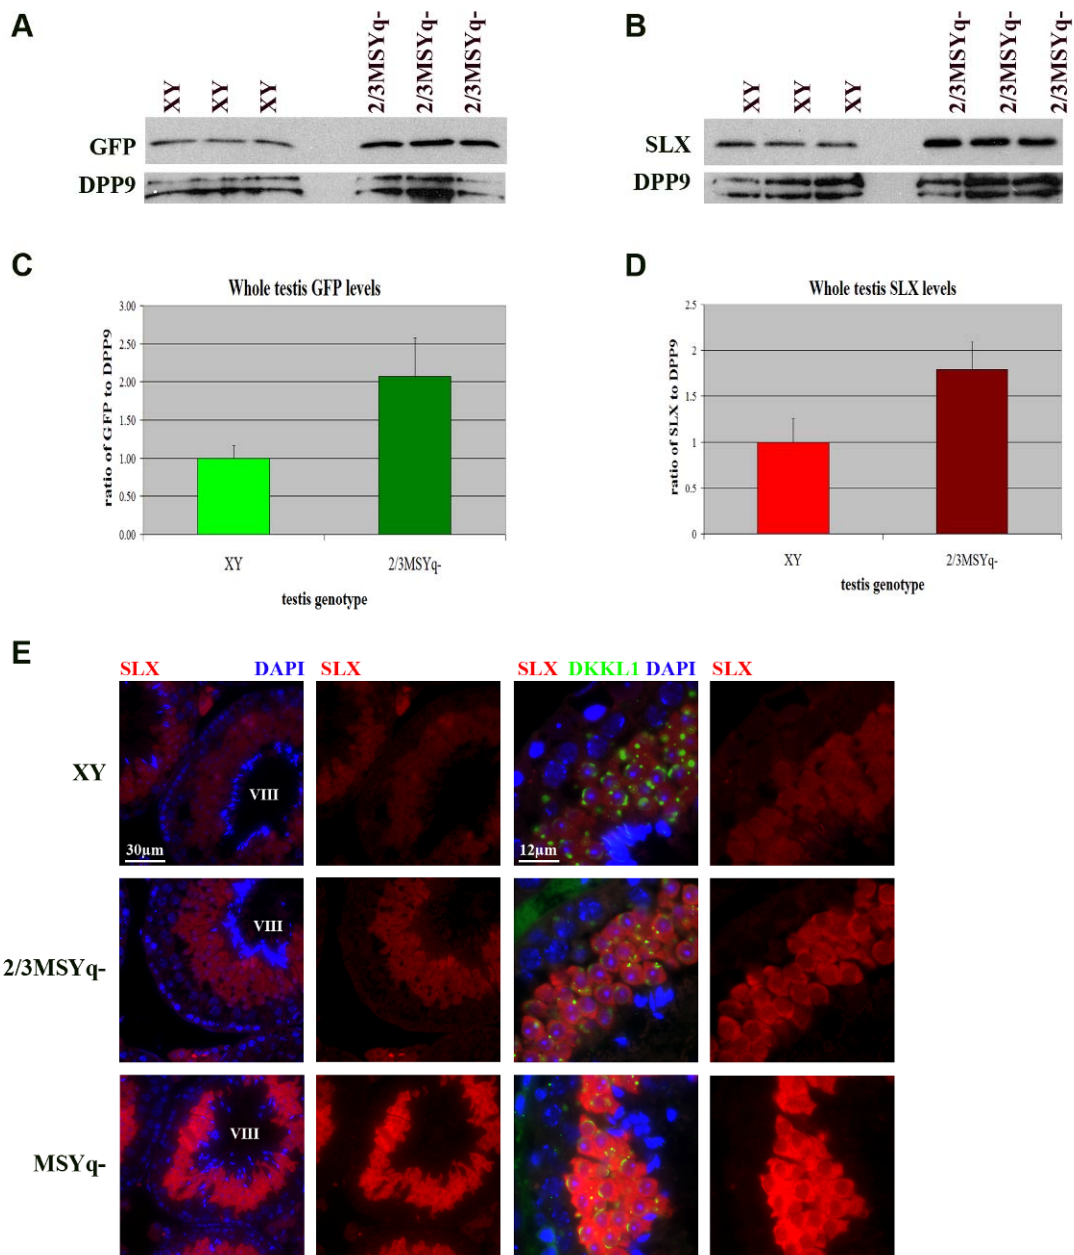

Supplement: supp_122_22_4239__4.pdf [file supp_122_22_4239__4.pdf]

## Supplemental Figure 5

**A**

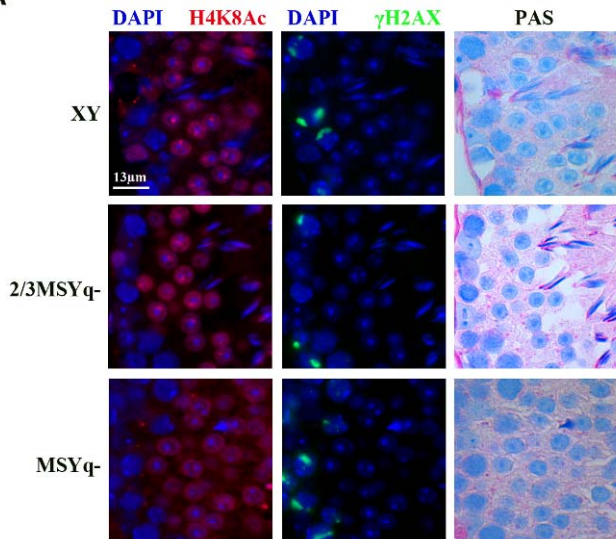

**B**

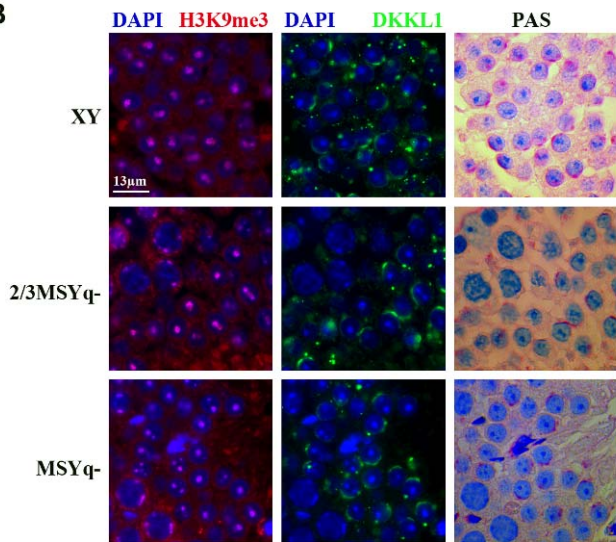

**C**

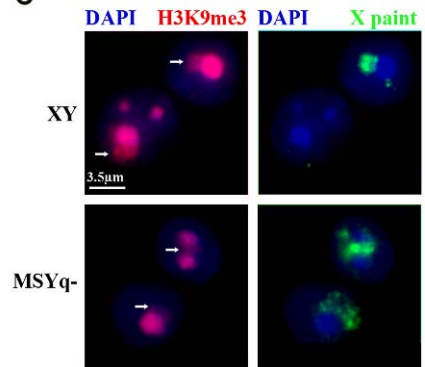

Supplement: supp_122_22_4239__5.pdf [file supp_122_22_4239__5.pdf]

## Supplemental Figure 6

**A**

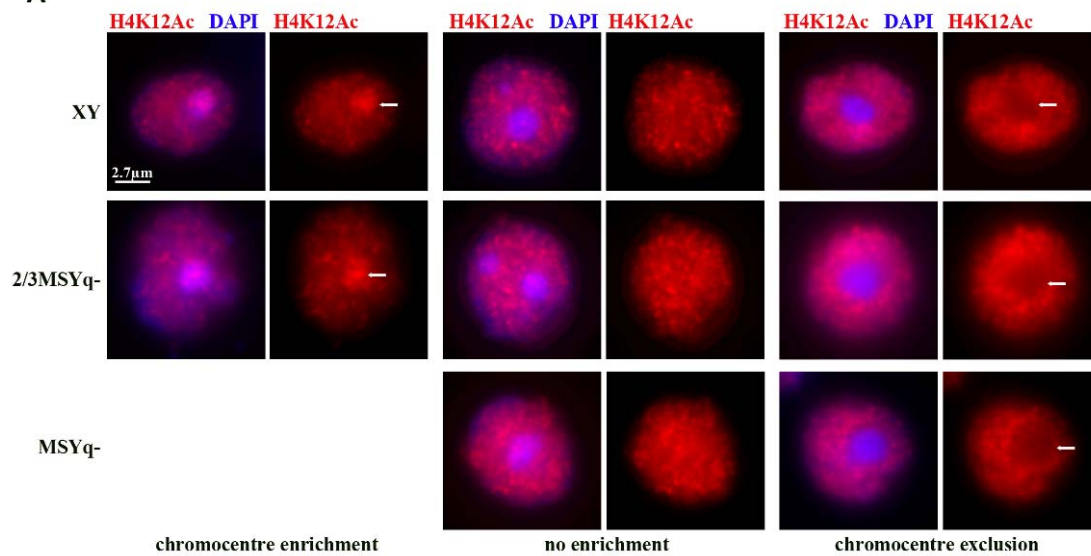

**B**

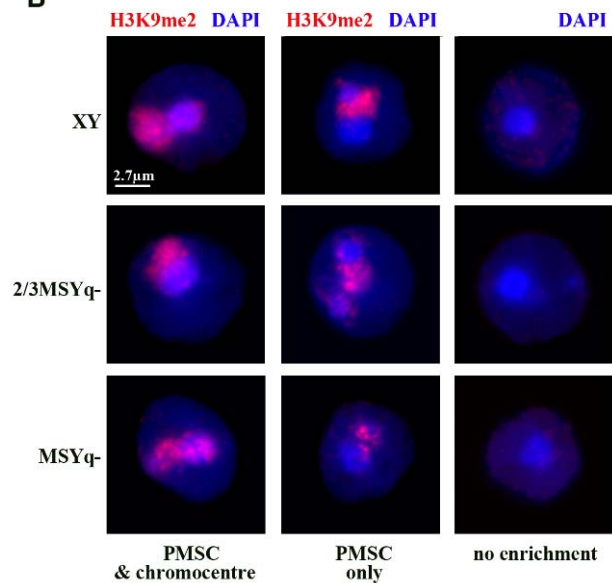

**C**

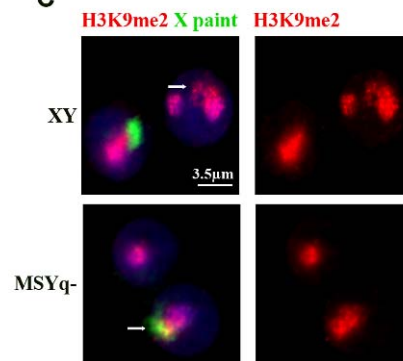

Supplement: supp_122_22_4239__6.pdf [file supp_122_22_4239__6.pdf]

## Supplemental Figure 7

**A**

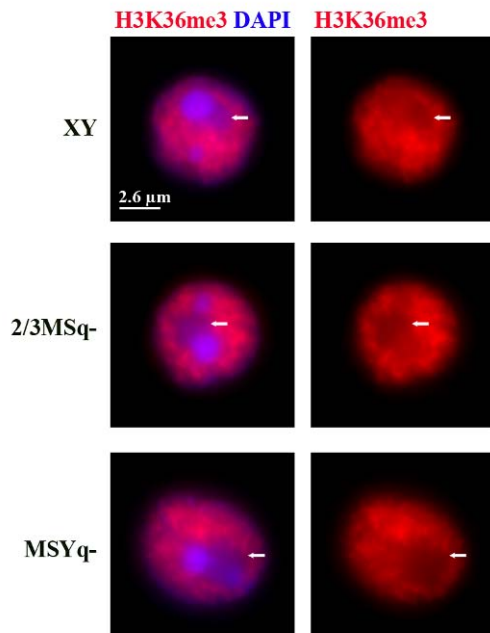

**B**

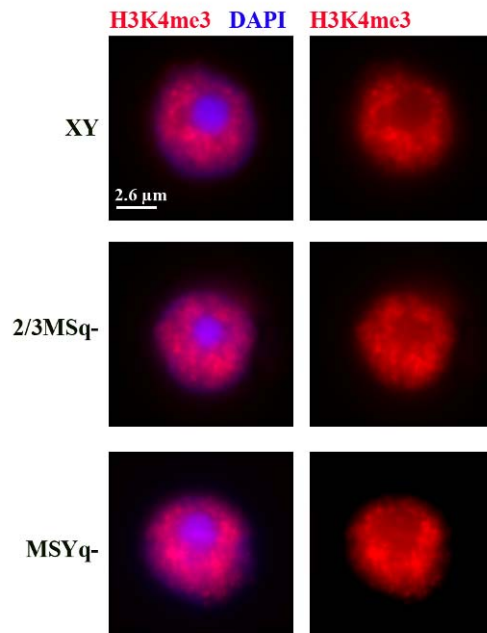

Supplement: supp_122_22_4239__7.pdf [file supp_122_22_4239__7.pdf]
